# Supplementary material for: Prior Elicitation for Use in Clinical Trial Design and Analysis: A Literature Review
Source: MDPI journal article supplement (doi:10.3390/ijerph18041833), 2021-02-13

Supplementary Material

Figure S1 Most frequent word within the Document Term Matrix

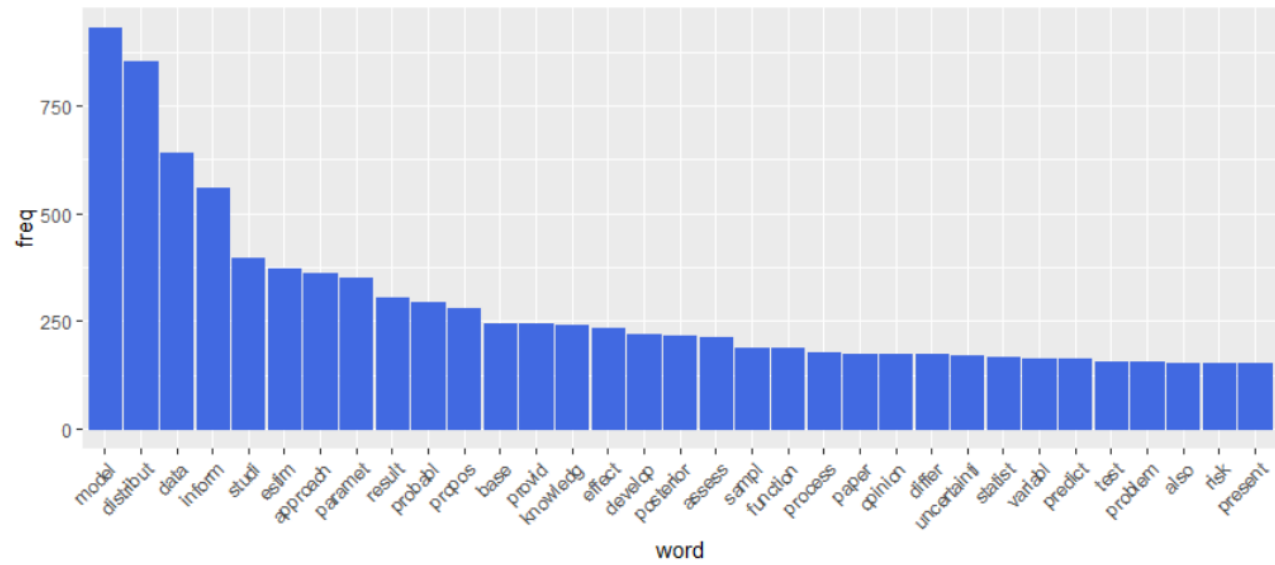

Figure S2 Pubmed published articles containing the word “Bayes” according to the publication year.

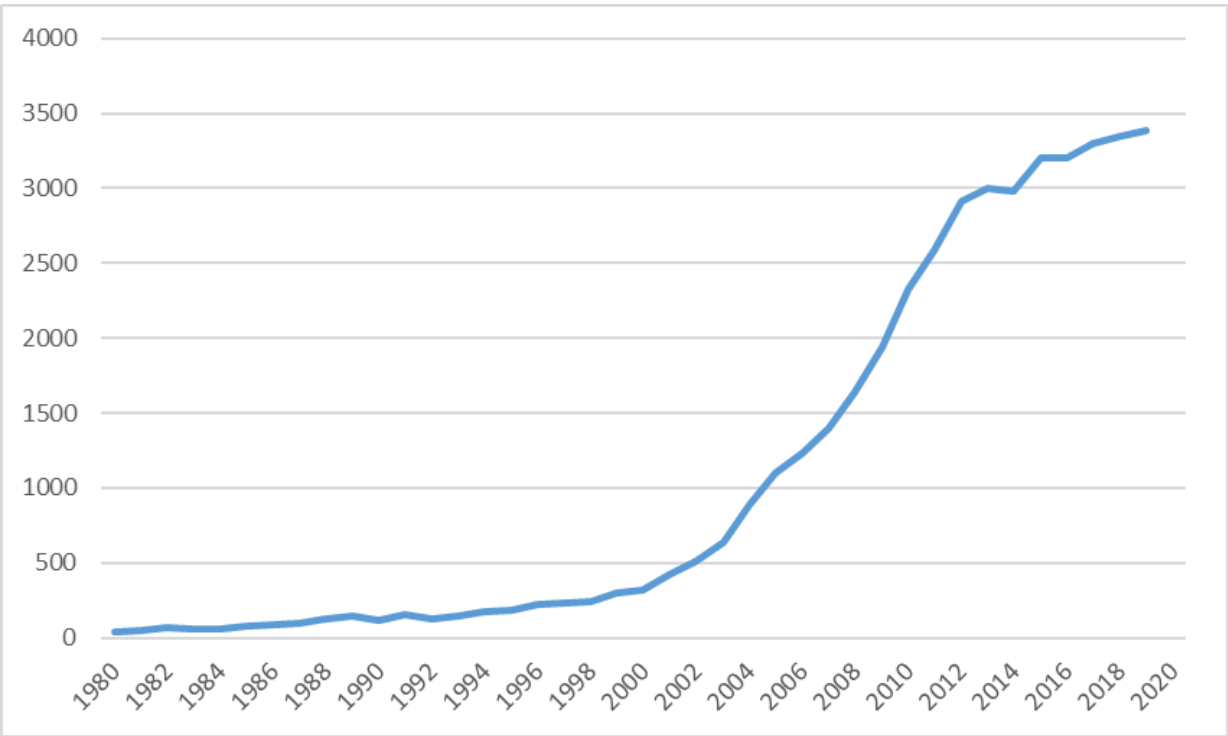

Supplement: s1 [file s1]
